1 **Semi-continuous propagation of influenza A virus and its defective interfering**  
2 **particles: analyzing the dynamic competition to select candidates for antiviral**  
3 **therapy**

4  
5 **Lars Pelz<sup>1,†</sup>, Daniel Rüdiger<sup>1,†</sup>, Tanya Dogra<sup>1,†</sup>, Fadi G. Alnaji<sup>2</sup>, Yvonne Genzel<sup>1</sup>, Christopher**  
6 **B. Brooke<sup>2</sup>, Sascha Y. Kupke<sup>1,\*</sup>, Udo Reichl<sup>1,3</sup>**

7  
8 <sup>1</sup>Max Planck Institute for Dynamics of Complex Technical Systems, Bioprocess Engineering,  
9 Magdeburg, Germany

10 <sup>2</sup>University of Illinois at Urbana-Champaign, Department of Microbiology, Urbana, Illinois, USA

11 <sup>3</sup>Otto-von-Guericke-University Magdeburg, Bioprocess Engineering, Magdeburg, Germany

12 <sup>†</sup>These authors contributed equally to this work.

13  
14 **\* Correspondence:**

15 Sascha Y. Kupke

16 [kupke@mpi-magdeburg.mpg.de](mailto:kupke@mpi-magdeburg.mpg.de)

17  
18 **Keywords:** Influenza A virus, defective interfering particles, antiviral, next-generation  
19 sequencing, continuous virus production

20  
21 **Abstract**

22 Defective interfering particles (DIPs) of influenza A virus (IAV) are naturally occurring mutants  
23 that comprise an internal deletion in one of their eight viral RNA (vRNA) segments, rendering  
24 them propagation-incompetent. Upon co-infection with infectious standard virus (STV), DIPs  
25 interfere with STV replication through competitive inhibition. Thus, DIPs are proposed as potent

26 antivirals for treatment of the influenza disease. To select corresponding candidates, we studied *de*  
27 *novo* generation of DIPs and propagation competition between different defective interfering (DI)  
28 vRNAs in a STV co-infection scenario in cell culture. A small-scale two-stage cultivation system  
29 that allows long-term semi-continuous propagation of IAV and its DIPs was used. Strong periodic  
30 oscillations in virus titers were observed due to the dynamic interaction of DIPs and STVs. Using  
31 next-generation sequencing, we detected a predominant formation and accumulation of DI vRNAs  
32 on the polymerase-encoding segments. Short DI vRNAs accumulated to higher fractions than  
33 longer ones, indicating a replication advantage. Yet, a sweet spot of fragment length was observed.  
34 Some DI vRNAs showed breaking points in a specific part of their bundling signal (belonging to  
35 the packaging signal), suggesting its dispensability for DI vRNA propagation. Over a total  
36 cultivation time of 21 days, several individual DI vRNAs accumulated to high fractions, while  
37 others decreased. Using reverse genetics for IAV, purely clonal DIPs derived from highly  
38 replicating DI vRNAs were generated. We confirm that these DIPs exhibit a superior *in vitro*  
39 interfering efficacy than DIPs derived from lowly accumulated DI vRNAs and suggest promising  
40 candidates for efficacious antiviral treatment.

## 41 42 **Importance**

43 Defective interfering particles (DIPs) emerge naturally during viral infection and typically show  
44 an internal deletion in the viral genome. Thus, DIPs are propagation-incompetent. Previous  
45 research suggests DIPs as potent antiviral compounds for many different virus families due to their  
46 ability to interfere with virus replication by competitive inhibition. For instance, the administration  
47 of influenza A virus (IAV) DIPs resulted in a rescue of mice from an otherwise lethal IAV dose.  
48 Moreover, no apparent toxic effects were observed when only DIPs were administered to mice and  
49 ferrets. IAV DIPs show antiviral activity against many different IAV strains, including pandemic  
50 and highly pathogenic avian strains, and even against non-homologous viruses, like SARS-CoV-

51 2, by stimulation of innate immunity. Here, we used a cultivation/infection system, which exerted  
52 selection pressure toward accumulation of highly competitive IAV DIPs. These DIPs showed a  
53 superior interfering efficacy *in vitro*, and we suggest them for effective antiviral therapy.

54

## 55 **1 Introduction**

56 Yearly, on average 400,000 people globally die from an infection with seasonal influenza A virus  
57 (IAV) (1). Moreover, the potential emergence of pandemic strains is a major threat to public health  
58 (2). The most effective prevention of the influenza disease is vaccination with tri- or quadrivalent  
59 formulations, which provide protection against different influenza virus strains (3, 4). However,  
60 influenza vaccines have to be reformulated annually as a result of antigenic drifts (5). This is  
61 associated with a potential decrease in vaccine efficacy due to false predictions and a vaccine  
62 mismatch to circulating strains (6). Furthermore, antiviral drugs targeting the viral neuraminidase  
63 (oseltamivir, zanamivir) (7) or the viral endonuclease (baloxavir) (8) may also be used. Yet,  
64 circulating strains have already shown resistance against available antivirals (9-11). Therefore, the  
65 development of effective prophylactic and therapeutic treatment options is urgently needed.

66 One promising approach for antiviral therapy is the application of defective interfering particles  
67 (DIPs) (12-16). These naturally occurring viral mutants feature an internal deletion in one of their  
68 eight viral RNA (vRNA) segments, which renders them defective in virus replication. In addition,  
69 a new species of IAV DIPs that showed point mutations on segment (Seg) 7 vRNA was discovered  
70 recently (17). DIPs can only replicate in a co-infection with infectious standard virus (STV), which  
71 complements the respective defect in the replication of the DIPs. These viral mutants are believed  
72 to interfere by preferential and faster replication of the defective interfering (DI) vRNA in  
73 comparison to the full-length (FL) vRNA, thereby drawing away cellular and viral resources

74 required for STV growth (18-20). Furthermore, interference was shown at the packaging step, as  
75 DI vRNAs can selectively outcompete FL vRNA packaging (21, 22). Notably, in mouse and ferret  
76 models, the administration of DIPs resulted in a pronounced antiviral effect against IAV infection  
77 (13, 14, 23-26). Furthermore, IAV DIPs also showed protection against heterologous interferon-  
78 sensitive respiratory viruses (27, 28), including SARS-CoV-2 (29), by the ability to stimulate innate  
79 immunity.

80 Recently, we established a two-stage bioreactor system for cell culture-based production of IAV  
81 (for vaccine manufacturing) (30), and of a prototypic, well-characterized DIP (“DI244” (23, 24,  
82 27)) (31). Here, uninfected cells (first bioreactor) were continuously fed to a second bioreactor that  
83 contained virus-infected cells. However, in such a continuous culture, the co-infection of STVs and  
84 DIPs typically result in periodic oscillations of virus titers due to their dynamic interactions.  
85 Moreover, *de novo* generation and accumulation of numerous DI vRNAs was observed (30, 31).

86 In the present study, a simplified, semi-continuous setup was used to thoroughly investigate the  
87 generation and growth competition between DIPs during 21 days of IAV infection. Assuming that  
88 DIPs showing exceptional propagation also show high interfering efficacies, we anticipated  
89 identification of potent candidates for antiviral therapy. For detection and quantification of the  
90 different deletion junction on the IAV vRNA level, we used a recently published next-generation  
91 sequencing (NGS) framework (32). We observed a small subset of highly accumulated DI vRNAs  
92 after 21 days post infection (dpi), while other deletion junctions showed a pronounced decrease in  
93 their fractions in the same timeframe. To generate corresponding purely clonal DIPs harboring the  
94 promising candidate DI vRNAs, we used reverse genetics for IAV. Indeed, these DIPs displayed a  
95 superior *in vitro* interfering efficacy compared to DIPs derived from lowly replicating DI vRNAs  
96 indicating their potential for antiviral therapy.

## 97 2 Results

### 98 2.1 Semi-continuous production of IAV results in periodic oscillations of virus titers and 99 strong accumulation of DIPs

100 In order to induce *de novo* generation and accumulation of DIPs, an IAV strain A/PR/8/34 of the  
101 subtype H1N1 (PR8, provided by Robert Koch Institute, Berlin, Germany) was propagated in a  
102 semi-continuous small-scale two-stage cultivation system (Fig. 1B). For infection, we used a seed  
103 virus that was depleted in DI vRNAs as shown by segment-specific reverse-transcription  
104 (RT)-PCR (Fig. 1A). Madin-Darby canine kidney (MDCK) cells growing in suspension culture  
105 (MDCK(sus)) were seeded into the cell seeding shake flask (CSS) and virus shake flasks (VS) at a  
106 viable cell concentration (VCC) of  $0.6 \times 10^6$  cells/mL and grown in batch mode to about  
107  $3.0 \times 10^6$  cells/mL (-1.6 dpi) (Supplementary Fig. 1). Subsequently, for both shake flasks, a  
108 calculated volume of cell suspension was discarded and fresh medium was added at regular time  
109 intervals (both shake flasks not yet connected in series). This resulted in a residence time (RT) of  
110 38.3 h for both vessels. Note that preliminary studies showed a steady state in the VCC for this RT  
111 (data not shown). Once the steady state was reached (Supplementary Fig. 1), cells in the VS were  
112 infected with PR8 at an MOI of 0.1. At 0.5 dpi, both vessels were connected in series and, from  
113 thereon, cells transferred semi-continuously from the CSS to the VS ( $V_2$ ). In addition, fresh  
114 medium was added to both shake flasks ( $V_1$  or  $V_3$ ) and virus harvest was taken ( $V_4$ ). The RT chosen  
115 was 38.3 h and 22.0 h for CSS and VS, respectively, as this previously resulted in pronounced titer  
116 fluctuations and strong accumulation of DIPs (31). Over the production time of 21 dpi, the steady  
117 state in the CSS was kept with an average VCC of  $2.6 \times 10^6$  cells/mL (SD of  $\pm 0.2 \times 10^6$  cells/mL)  
118 (Supplementary Fig. 1).

119 Strong periodic oscillations in the infectious virus titers (quantified by TCID<sub>50</sub> assay) and in the  
120 extracellular vRNA level of Seg 5 (quantified by real-time RT-qPCR) were observed in the VS  
121 (Fig. 1C). The extracellular vRNA level of Seg 5 was taken as a measure of the total virus  
122 concentration. DI vRNAs are mostly located on polymerase-encoding segments (20, 33-36), so the  
123 occurrence of DIPs should not affect the detection of Seg 5 vRNA. Shortly after infection at 0.5 dpi,  
124 a maximum infectious virus titer of  $5.6 \times 10^8$  TCID<sub>50</sub>/mL was reached. Here, high concentrations  
125 of STV (complying with a high MOI) increased the chance for co-infections with DIPs. Thus, a  
126 strong DIP propagation likely occurred early in cultivation, impeding STV propagation. Therefore,  
127 infectious virus titers decreased from 0.5 dpi onwards. Eventually, the declining infectious virus  
128 titers led to fewer co-infections. Thus, DIP replication decreased, and the total virus particle  
129 concentration dropped as well. Additionally, DIPs were out-diluted because of the semi-continuous  
130 feeding strategy. Then, at a low infectious virus concentration (complying with a low MOI  
131 condition, ~4.0 dpi), the chance of DIP co-infections was supposedly significantly reduced. In  
132 these conditions, STVs could accumulate again as indicated by increasing virus titers toward 5 dpi.  
133 In the following, further periodic oscillations in virus titers occurred based on the DIP/STV  
134 interaction described above.

135 The dynamics in virus titers were well in agreement with results of the segment-specific RT-PCR  
136 (indicating FL and DI vRNAs) (Fig. 1D). A rapid accumulation of DI vRNAs occurred already at  
137 0.5 dpi. Furthermore, the FL vRNA signal gradually dropped between 1 dpi and 2.5 dpi, suggesting  
138 the preferential production of DI vRNAs. Subsequently, DI vRNA replication decreased and DI  
139 vRNAs were washed out, as indicated by weaker band intensities of DI vRNAs (e.g. at 8.5 dpi).  
140 Next, in agreement with the increase of infectious viral titers (STVs), FL vRNA bands were visible  
141 again (e.g. at 9 dpi). Moreover, agarose gels indicated the presence of DI vRNA bands at the end  
142 of cultivation that may have been already present in the seed virus, suggesting that some DI vRNAs

143 were preserved. In addition, weak DI vRNA bands as well as undefined, blurred bands emerged  
144 during the course of IAV replication, suggesting the formation and accumulation of *de novo*  
145 generated DI vRNAs.

146 In summary, the semi-continuous production of IAV using a seed virus depleted in DI vRNAs led  
147 to the accumulation of DIPs. Thus, strong periodic oscillations in the total concentration of virions  
148 and infectious virus titers were observed due to the dynamic interaction of STVs and DIPs.  
149 Moreover, in the course of production, DIPs were exposed to high and low MOI conditions that  
150 have likely resulted in alternating selection pressures, suitable for potential selection toward  
151 accumulation of highly interfering DIPs.

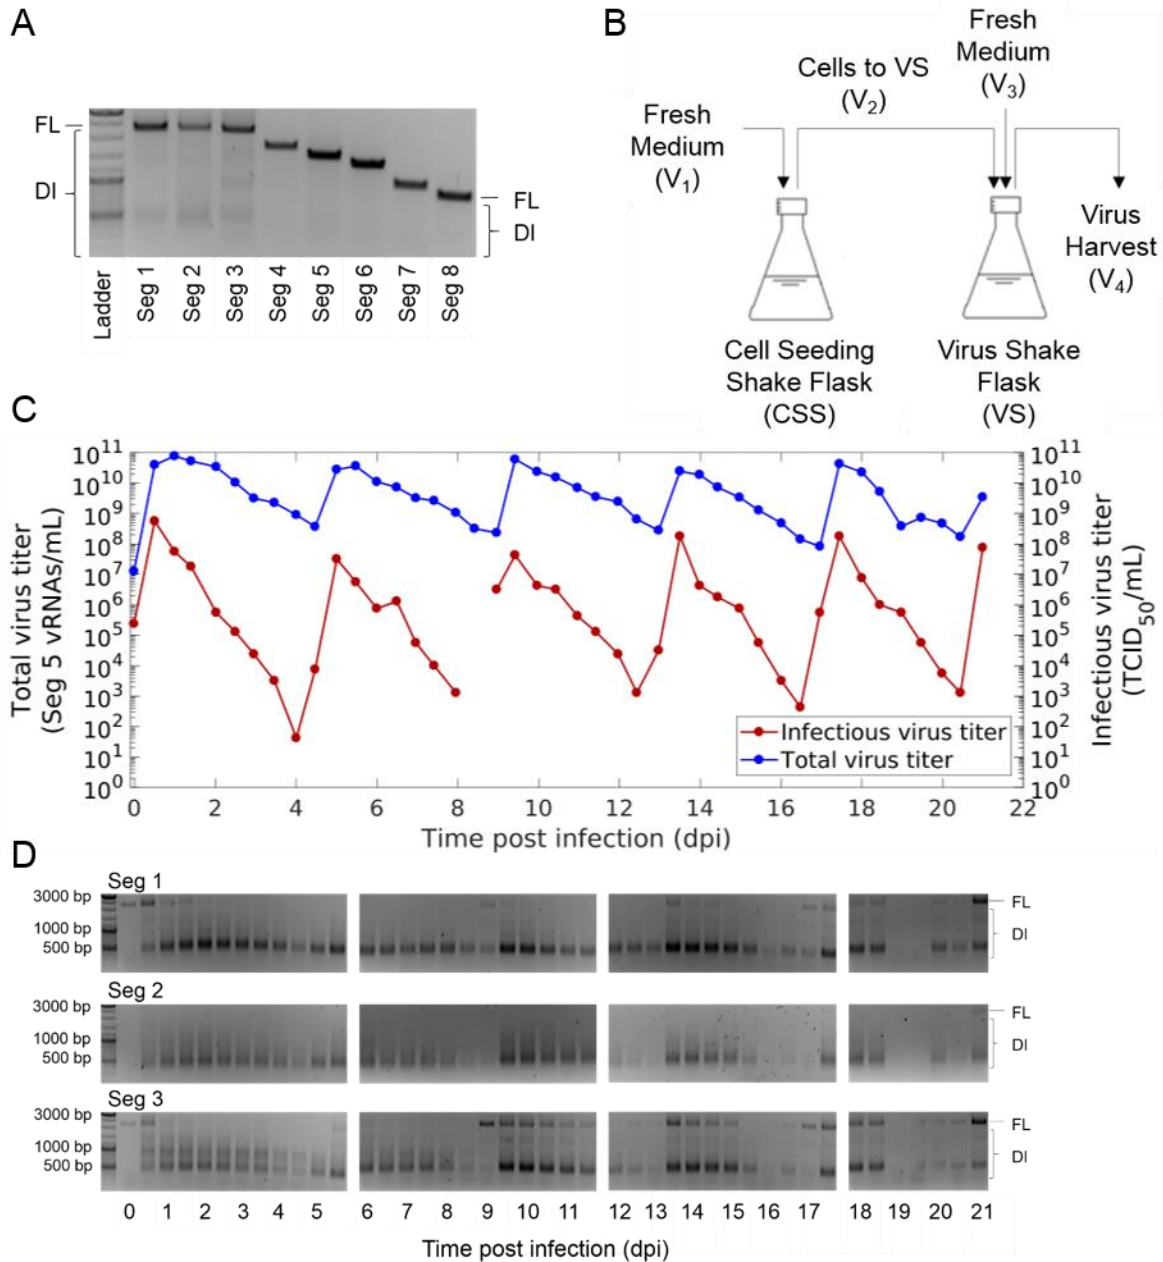

152

153 **Figure 1: Semi-continuous propagation of influenza A virus and DIPs.** (A) PR8 seed virus depleted in DI vRNAs  
 154 was used for infection. Results of segment-specific RT-PCR for Seg 1 to 8 followed by agarose gel electrophoresis are  
 155 shown. Signals corresponding to FL and DI vRNAs are indicated. Upper, middle and lower thick bands of the DNA  
 156 ladder indicate 3000, 1000 and 500 bp, respectively. (B) Experimental setup of the small-scale two-stage cultivation  
 157 system in shake flasks (scheme adapted from F. Tapia et al. (37)). MDCK(sus) cells were grown in the CSS and VS.  
 158 After an initial batch and semi-continuous phase (CSS and VS not coupled), the cells in the VS were infected with the  
 159 seed virus (A) at an MOI of 0.1. The semi-continuous production mode was initiated 0.5 dpi, where cells were  
 160 transferred from the CSS into the VS ( $V_2$ ) at regular time intervals, while fresh medium was added ( $V_1$  or  $V_3$ ) and  
 161 virus harvest was taken for monitoring ( $V_4$ ). (C) Periodic oscillations of total and infectious virus titers during the  
 162 production. vRNA level of Seg 5 (indicating total virus particle concentration) was quantified by real-time RT-qPCR



163 and infectious virus titer by TCID<sub>50</sub> assay. D) Accumulation of DI vRNAs over the semi-continuous production time  
164 of 21 days. Results of the segment-specific RT-PCR are shown for Seg 1, 2, and 3. Signals corresponding to FL and  
165 DI vRNAs are indicated. Illustration includes results of one experiment.

166  
167 **2.2 Next-generation sequencing results indicate predominant *de novo* formation and**  
168 **accumulation of deletion junctions on polymerase-encoding segments**

169 Segment-specific RT-PCR does not enable the detection and quantification of individual deletion  
170 junctions. Therefore, to study the diversity of DI vRNAs generated during semi-continuous IAV  
171 propagation, samples were subjected to Illumina-based NGS and processed by a bioinformatics  
172 pipeline (32). Doing so, sequences of vRNAs from the produced progeny virions were obtained.  
173 Reads comprising a deletion junction (DI vRNA reads) do not align to the corresponding reference  
174 genome. These NGS reads were processed by the ViReMa algorithm to identify the position of  
175 individual deletion junctions (38).

176 The highest variation (i.e., number of different deletion junction) was found on the polymerase-  
177 encoding segments 1–3, which encode for the polymerase basic protein 2 (PB2) and 1 (PB1), and  
178 polymerase acidic protein (PA), respectively (Fig. 2A). Fig. 2B shows the fraction of all deletion  
179 junctions located on a genome segment over time. Here, polymerase-encoding segments showed  
180 the highest fraction. In contrast, deletion junctions of non-polymerase-encoding segments showed  
181 a significantly lower fraction, which increased slightly toward the end of cultivation but always  
182 remained below 2%. As non-polymerase segment deletion junctions occurred only in negligible  
183 numbers, they were not considered any further in subsequent analyses.

184 Next, we investigated the *de novo* formation of DI vRNAs over the course of the cultivation.  
185 Fig. 2C shows, at specific time intervals, the number of *de novo* generated deletion junctions. *De*  
186 *novo* formation occurred mainly on the polymerase-encoding segments. Interestingly, most *de novo*

187 formations occurred within the first 1.5 dpi. In addition, a considerable number of *de novo* DI  
188 vRNAs was detected between 3.5–5.5 dpi. However, *de novo* formation was significantly lower at  
189 later time points. Moreover, an increase in the number of new deletions was highly correlated with  
190 an increase in the total virus particle concentration (indicated by the vRNA level of Seg 5)  
191 (Fig. 2C). This is consistent with a fast STV replication, and thus, likely with a higher occurrence  
192 of the *de novo* formation of DI vRNAs due to the error-prone nature in the replication of the IAV  
193 RNA-dependent RNA polymerase.

194 In sum, our results show that DI vRNAs are predominantly *de novo* formed and accumulated on  
195 the polymerase-encoding segments during semi-continuous IAV infection.

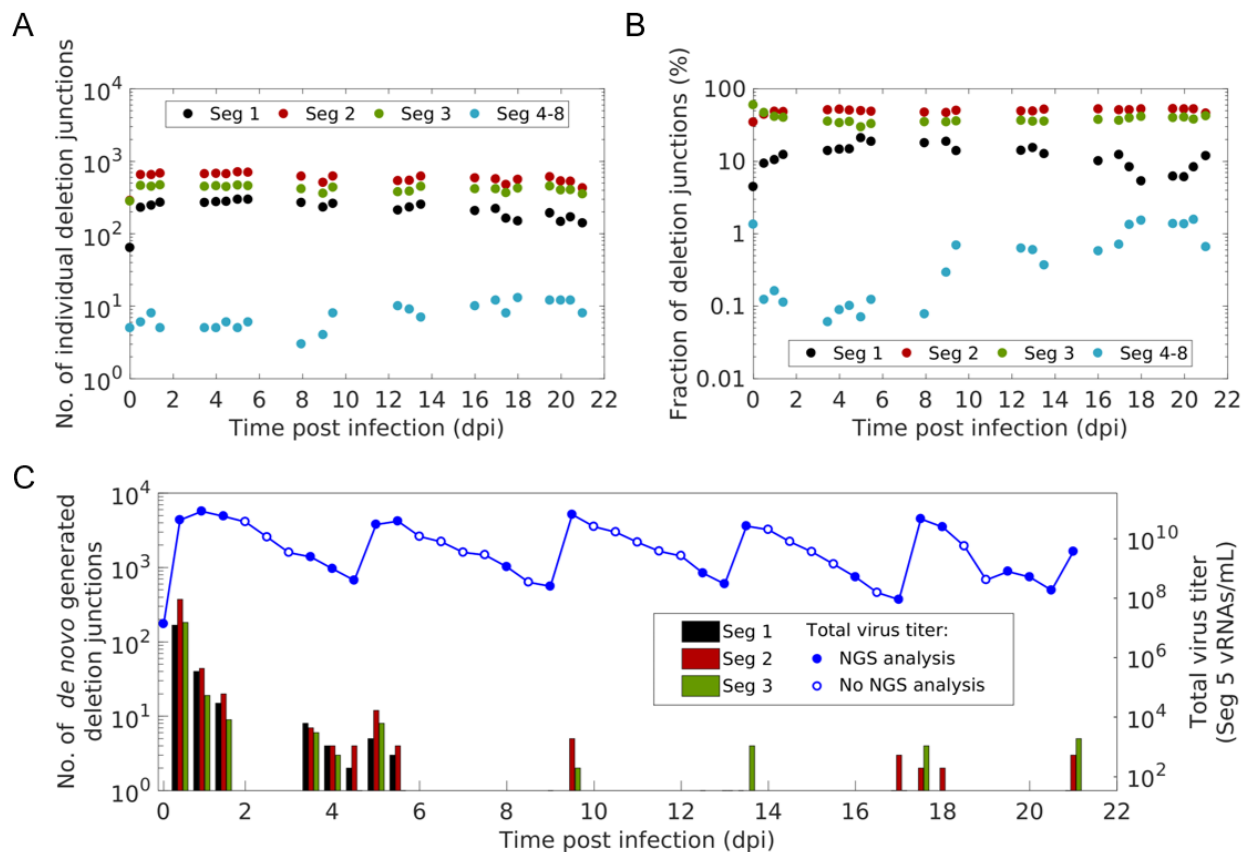

196

197 **Figure 2: Diversity, distribution and *de novo* generation of deletion junctions during semi-continuous**  
198 **propagation of IAV.** Deletion junctions were identified by Illumina-based NGS and subsequent analysis via the  
199 ViReMa algorithm (32). (A) Number of different deletion junctions located on the respective genome segment(s). (B)

200 Fraction of all deletion junctions located on the respective genome segment(s). This fraction describes the ratio of the  
201 total number of detected deletion junctions for one segment to the total number of deletion junctions on all genome  
202 segments. (C) *De novo* formation of deletion junctions. vRNA level of Seg 5 (indicating total virus particle  
203 concentration, as shown in Fig. 1C) was quantified by real-time RT-qPCR. Samples not analyzed by NGS are indicated  
204 by blank dots. Illustration includes results of one experiment.

205  
206 **2.3 Short DI vRNAs tend to accumulate to higher fractions than longer ones; yet,**  
207 **intermediate length sweet spots were observed as well**

208 It was reported that DI vRNAs accumulation surpasses that of FL vRNAs due to their shorter length  
209 resulting in a supposedly faster replication (12, 20). Therefore, we speculated that shorter DI  
210 vRNAs may also accumulate to higher abundances than longer DI vRNAs. Fig. 3 shows the  
211 fraction of all individual deletion junctions and their corresponding DI vRNA length. Indeed, a bias  
212 toward accumulation of shorter DI vRNAs was observed with short DI vRNAs showing overall  
213 higher fractions than longer ones during semi-continuous IAV production (Fig. 3). However,  
214 highest fractions were not found for the shortest DI vRNAs. It rather appeared that highest fractions  
215 were found at a length sweet spot. To visualize this sweet spot, we fitted a normal distribution  
216 function to the DI vRNA length (Supplementary Fig. 2), and plotted the resulting mean as a dashed  
217 vertical line (Fig. 3). Over the whole cultivation, the mean DI vRNA length ranged between 366–  
218 414 nt, 425–534 nt, and 434–557 nt for Seg 1, 2, and 3, respectively.

219 Moreover, a few larger DI vRNAs (comprising a sequence length of up to 1000 nt) accumulated to  
220 high fractions, suggesting that the sequence and the position of the deletion junction may be another  
221 factor to consider for replication of a DIP (Fig. 3). Note that Fig. 3 only shows DI vRNAs up to  
222 1000 nt in length, although we also detected very long DI vRNAs (>2000 nt) (Supplementary  
223 Fig. 3). These DI vRNAs with very short deletions may either not result in a defective vRNA,  
224 comprise two deletions or represent technical artifacts. Due to their unknown origin and function

225 and a lack of description in the literature, defective vRNAs larger than 85 % of its respective FL  
226 length were excluded from analysis in this work (shown in Supplementary Fig. 3).  
227 Taken together, shorter DI vRNAs showed an overall stronger accumulation compared to longer  
228 DI vRNAs. However, highest fractions were found at a sweet spot, indicative for an optimal length  
229 for efficient DI vRNA replication and spreading.

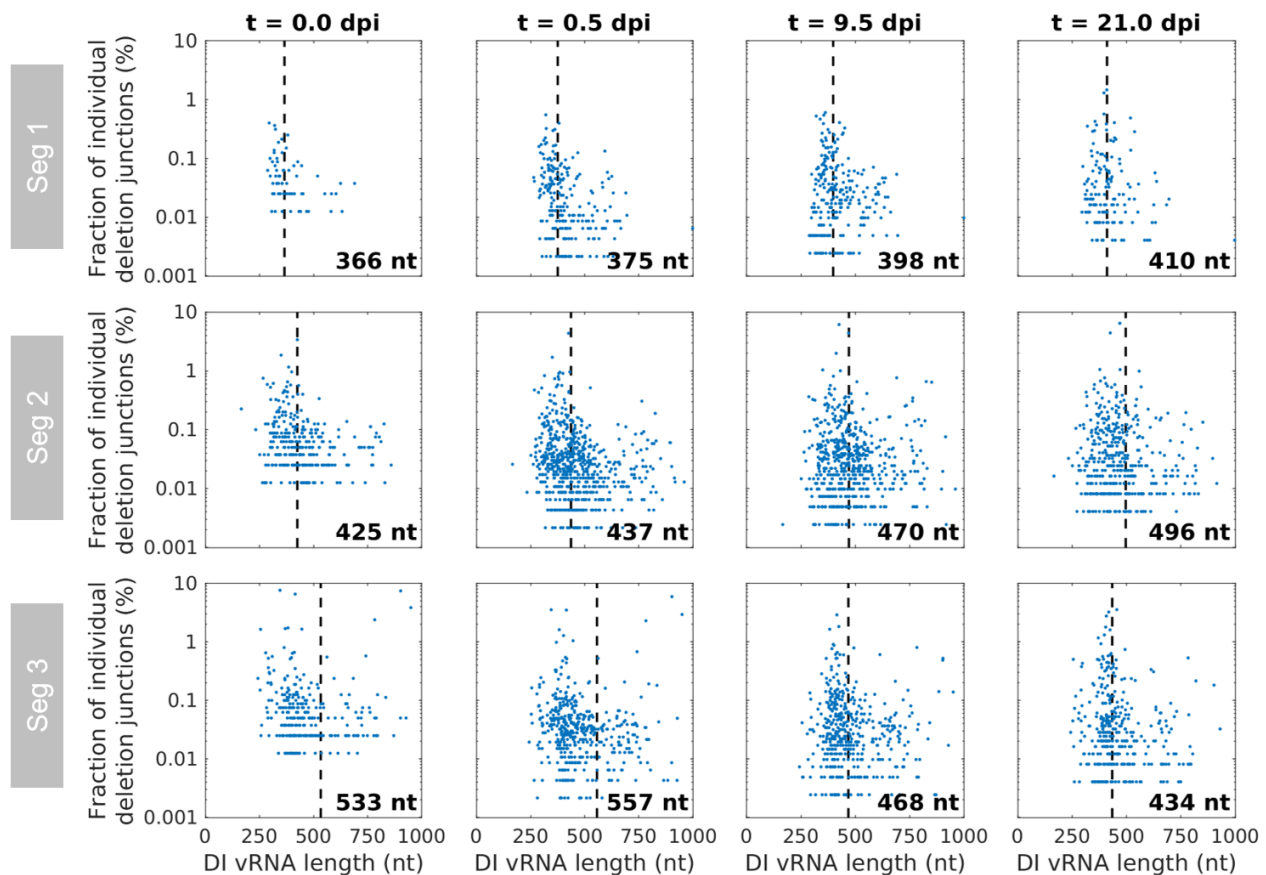

230  
231 **Figure 3: Dependency of the length of DI vRNAs on their accumulation during semi-continuous propagation of**  
232 **IAV.** Deletion junctions were identified by Illumina-based NGS and subsequently analyzed via the ViReMa algorithm  
233 (32). Fractions of individual deletion junctions were calculated based on the ratio of the number of NGS reads of one  
234 individual deletion junction to the number of NGS reads of all deletion junctions located on all eight segments. Means  
235 of DI vRNA length (calculated by fitting a normal distribution function) are indicated by dashed vertical lines and  
236 corresponding lengths are shown. Representative time points are illustrated. Illustration includes results of one  
237 experiment.

## 238 **2.4 The incorporation signal but not the entire bundling signal appears to be required for** 239 **propagation of DIPs**

240 We next examined the position of the breaking points of DI vRNAs. Fig. 4 illustrates the position  
241 of individual deletion junctions, as indicated by the number of retained nucleotides prior (DI vRNA  
242 3' length) and after (DI vRNA 5' length) the deletion junction site. In the course of the semi-  
243 continuous cultivation, breaking points were mostly located in proximity to both ends of vRNA  
244 (Fig. 4). This finding is in line with our observation of the predominant accumulation of short DI  
245 vRNAs (Fig. 3.). We also observed highly abundant medium-sized DI vRNAs on Seg 3 in the seed  
246 virus (0.0 dpi). Yet, the fraction of DI vRNAs carrying these deletions decreased, or even  
247 disappeared toward the end of cultivation (Fig. 3). Again, this indicates that shorter DI vRNAs  
248 replicate faster and may outcompete longer ones. Additionally, the 3' length of the DI vRNA did  
249 largely not correlate with the 5' length, suggesting that deletion junctions are not preferably  
250 symmetrical.

251 While the lengths of the 3' and 5' ends ranged from below 100 nt to over 500 nt, specific minimum  
252 lengths were retained in the DI vRNAs (Fig. 4). We then asked whether the complete packaging  
253 signal (situated at the terminal ends of vRNA), which is important for organized packaging into  
254 progeny virions (39), was unaffected by deletions. A small percentage of breaking points was  
255 located in the packaging signal (on Seg 1 and 2); yet, the majority of the deletion junction sites  
256 were located outside of it, which is in line with the observation of a sweet spot in DI vRNA length  
257 (Fig. 3). For a more thorough investigation of deletion junctions in the packaging signal, we  
258 highlighted the positions of the incorporation signal (non-coding region (NCR), including the  
259 promoter region) and the bundling signal (terminal ends of coding region) (40). The incorporation  
260 signal was reported to lead the packaging of the vRNA in which the signal is found. The second

261 part of the packaging signal is the bundling signal, which confers the selective packaging of all the  
262 eight different segments together (40). We checked which part of the sequence at both ends were  
263 retained to infer a minimum sequence length for functional replication and packaging of the  
264 truncated vRNAs, assuming that only propagation-competent DI vRNAs can be detected. No  
265 deletion junctions in the incorporation signal for the polymerase-encoding segments as well as for  
266 Seg 4–8 were identified (Fig. 4, Supplementary Fig. 4, respectively). Therefore, we suggest that  
267 the preservation of the entire incorporation signal is crucial for the propagation of DIPs

268 Interestingly, deletion junctions in the bundling signal (on Seg 1 and 2) could be detected,  
269 indicating that the entire bundling signal of these segments is most likely not required for  
270 propagation of DIPs. In particular, clusters of DI vRNA breaking points in the bundling signal were  
271 stable and present over the complete course of the semi-continuous cultivation. In contrast, Seg 3  
272 did not show any breaking points in both signals. We found a minimum sequence length of 84 nt  
273 (3' end) and 100 nt (5' end), 25 nt and 95 nt, and 82 nt and 95 nt for Seg 1, 2, and 3, respectively.  
274 Supplementary Fig. 4 shows the position of deletion junction sites in Seg 4–8. Notably, although  
275 only very few individual deletion junctions were detected, breaking points were found in the  
276 bundling signal on Seg 6 (3' end), Seg 7 (both ends), and Seg 8 (5' end) as well.

277 In summary, our results indicate that the complete incorporation signal is crucial for propagation  
278 of DIPs. Yet, only a part of the bundling signal in Seg 1 and 2 seem to be required for DIP  
279 spreading.

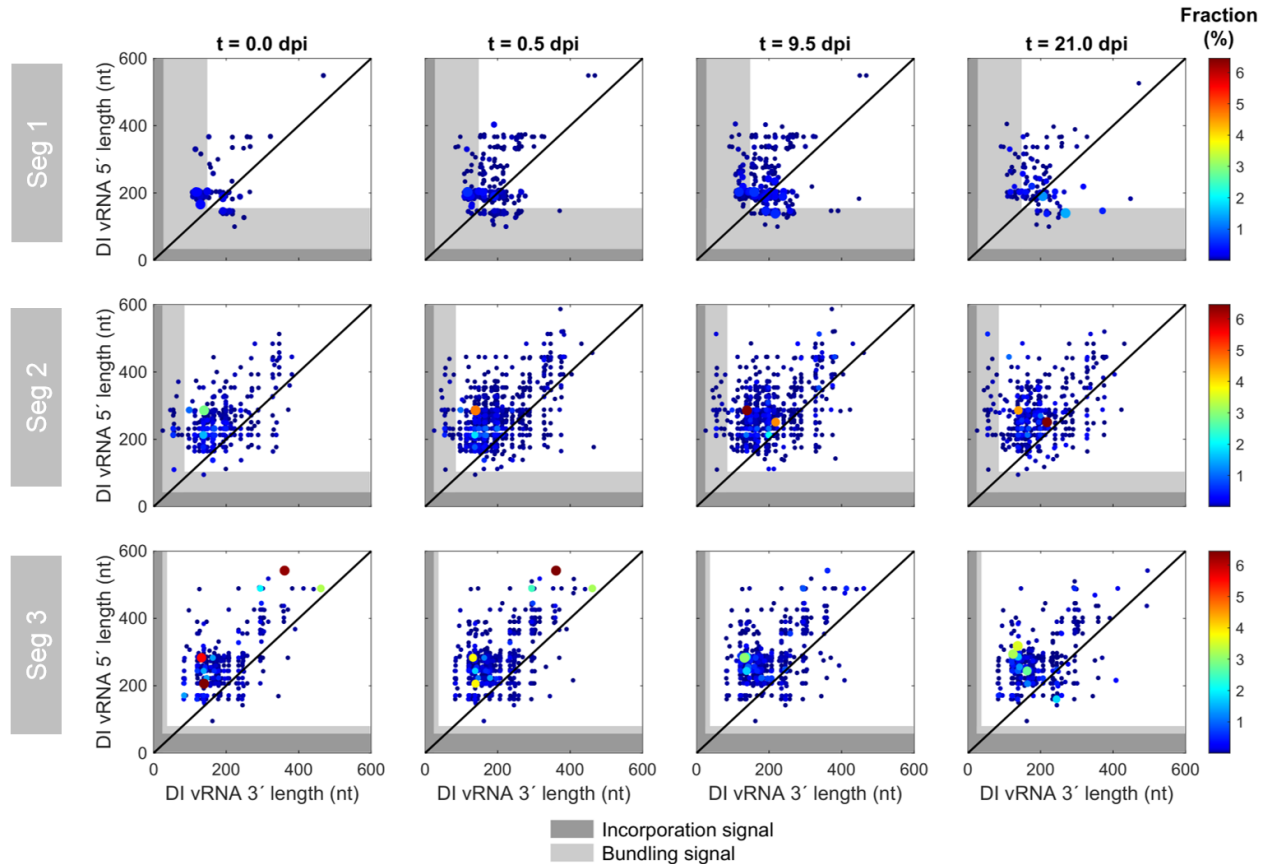

280

281 **Figure 4: Deletion junction sites of DI vRNAs during semi-continuous propagation of IAV.** Deletion junctions  
282 were identified by Illumina-based NGS and subsequently analyzed via the ViReMa algorithm (32). DI vRNA 3' and  
283 5' length indicate the number of retained nucleotides prior and after the deletion junction, respectively, at the  
284 corresponding vRNA ends. The packaging signal is indicated as grey areas, which is divided into the incorporation  
285 signal (dark grey area) and bundling signal (light grey area). Representative time points are illustrated. The color code  
286 from red to blue shown on the right denotes the fraction of individual deletion junction, which was calculated based  
287 on the ratio of the number of NGS reads of one individual deletion junction to the number of NGS reads of all deletion  
288 junctions located on all eight segments. Additionally, the circle radii increase with higher fractions. The diagonal black  
289 line indicates an equal DI vRNA 3' and 5' length. Illustration includes results of one experiment.

290

## 291 **2.5 Dynamic competition in propagation between DI vRNAs leads to selection toward** 292 **accumulation of highly interfering DIPs**

293 In order to elucidate whether the various DI vRNAs show differences in their propagation, we next  
294 studied the composition of deletion junctions over cultivation time. More specifically, we



295 determined the fraction of each individual deletion junction over time. Fig. 5A shows these  
296 fractions and highlights the top five deletion junctions that showed the highest gain or largest loss  
297 in their fraction from the seed virus (0 dpi) to the end of cultivation (21 dpi). Likewise, the top five  
298 gains of *de novo* formed DI vRNAs are indicated. Interestingly, differences between gains and  
299 losses were very pronounced, with a decreasing fraction of the top five losses, while the top five  
300 gains (including *de novo*) showed a strong accumulation. These trends were most prominent for  
301 Seg 3. Of note is also one deletion junction on Seg 2 that was present at a very high fraction in the  
302 seed virus and throughout the whole cultivation. Furthermore, pronounced shifts in the composition  
303 of deletion junctions were found for 9–9.5 and 17–17.5 dpi, at best visible for Seg 3. The  
304 occurrence of DI vRNAs that accumulate faster and achieve higher fractions than other DI vRNAs  
305 suggests that there was a dynamic competition in the propagation between individual DI vRNAs.

306 Moreover, we examined whether top gains (including *de novo*) and losses show differences in the  
307 deletion junction position (Fig. 5B). To obtain a better overview, we expanded the number of the  
308 top candidates in each category to 15. However, it appeared that no clear differences between the  
309 groups were present. For both gains and losses, few deletion junction sites were located in the  
310 bundling signal for Seg 1 and 2 (although most were found outside (Fig. 5B)), but none for Seg 3.  
311 Therefore, even for competitive DIPs (which require an efficient packaging process), we found a  
312 shorter packaging signal compared to the FL vRNA on Seg 1 (both ends) and on Seg 2 (3' end).  
313 Please also note a few DI vRNAs (belonging to the top 15 losses) on Seg 3 showing a medium-  
314 sized DI vRNA length (~900 nt) (Fig. 5B, upper right corner), which is in line with our observation  
315 that long DI vRNAs accumulate to low fractions (Fig. 3). Yet, we also found two top 15 gains (*de*  
316 *novo*) on Seg 2 with a very long DI vRNA (1905 nt and 1628 nt) (Supplementary Fig. 5). This  
317 finding might suggest that not only the sequence length but also the breaking point position and  
318 probably further unknown regulatory effects are crucial for the efficient propagation of DI vRNAs.



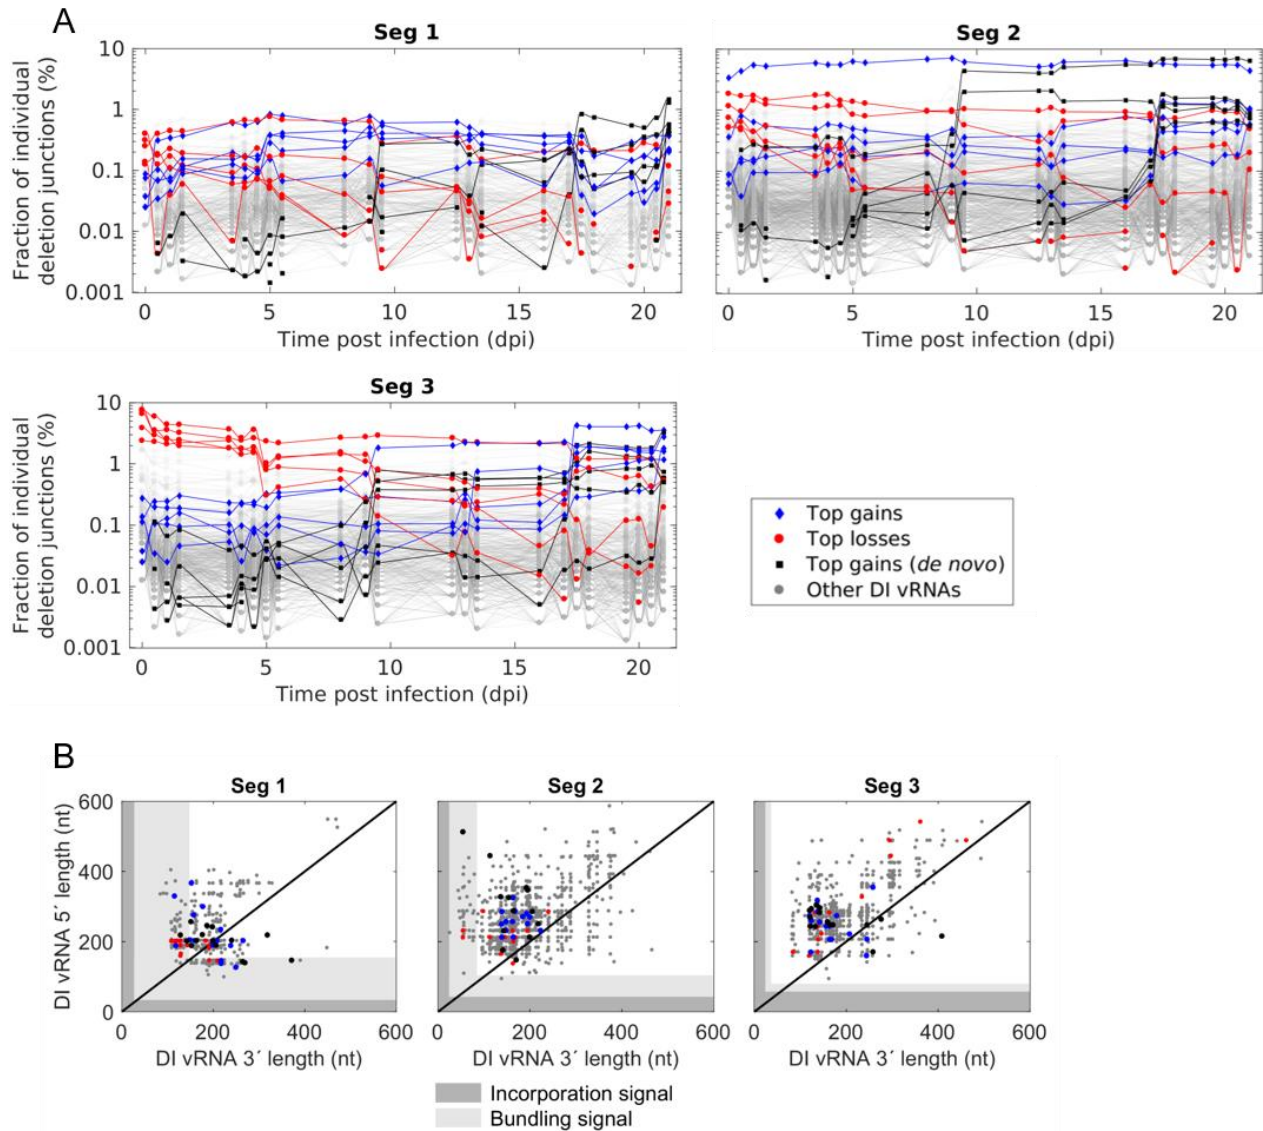

319

320 **Figure 5: Propagation of DI vRNAs showing highest gains or losses in their fractions during semi-continuous**  
 321 **propagation of IAV.** Deletion junctions were identified by Illumina-based NGS and subsequently analyzed via the  
 322 ViReMa algorithm (32). Fractions of individual deletion junctions were calculated based on the ratio of the number of  
 323 NGS reads of one individual deletion junction to the number of NGS reads of all deletion junctions located on all eight  
 324 segments. (A) Fraction of individual DI vRNAs belonging to the group of top five gains, losses, and gains (*de novo*)  
 325 of the fraction over cultivation time. Top gains (*de novo*) indicate newly formed deletion junctions with the highest  
 326 fraction at the end of cultivation. (B) Deletion junction position of the top 15 gains, losses, and gains (*de novo*). DI  
 327 vRNA 3' and 5' length indicate the number of retained nucleotides prior and after the deletion junction, respectively,  
 328 at the corresponding vRNA ends. The packaging signal is indicated as grey areas, which is divided into the  
 329 incorporation signal (dark grey area) and bundling signal (light grey area). Illustration includes results of one  
 330 experiment.

331 In order to test the hypothesis, that fast-propagating DI vRNAs show a higher interfering efficacy  
332 than slow-propagating ones, we reconstituted the corresponding DIPs and tested them in an *in vitro*  
333 interference assay. More specifically, we rescued purely clonal DIPs (in the absence of STV)  
334 harboring either the top gain, top loss, or top gain (*de novo*) DI vRNA of Seg 1 (Supplementary  
335 Table 5) using a modified reverse genetics system for IAV DIPs (25, 41). Next, we propagated  
336 these selected DIPs in genetically engineered MDCK-PB2(sus) cells, expressing PB2  
337 (Supplementary Fig. 6), to allow multiplication of these DIPs (harboring a deletion in Seg 1)  
338 without STV through complementation. Almost complete absence of contamination with other DI  
339 vRNAs was confirmed by results of segment-specific RT-PCR (Supplementary Fig. 7).

340 In the *in vitro* interference assay (Fig. 6), adherent MDCK cells (MDCK(adh) cells) were infected  
341 with STV at an MOI of 0.01 and co-infected with the different DIPs to evaluate the inhibition of  
342 STV replication compared to infection with STV alone (NC). Here, the DIP input for the  
343 interference assay was normalized through dilution based on the concentration of DIPs to ensure a  
344 direct comparison between the DIPs (Supplementary Table 7). In addition, we compared the  
345 interfering efficacy to a prototypic, well-characterized DIP named DI244 (23-25, 27). Indeed, the  
346 DIPs derived from the top gains (including *de novo*) showed the highest interfering efficacy. The  
347 top gain (*de novo*) DIP reduced the infectious virus release by more than five orders of magnitudes,  
348 the top gain by five logs, while top loss and DI244 showed a reduction of only four orders of  
349 magnitudes. Reduction of the total virus particle release, indicated by the HA titer, showed a similar  
350 trend (Fig. 6B).

351 In summary, our results indicate that the semi-continuous propagation of IAV led to a dynamic  
352 competition in propagation between different DI vRNAs. We demonstrate that DI vRNAs showing  
353 the highest increase in the fraction over the cultivation period result in the formation of DIPs that

354 show a superior interfering efficacy compared to DIPs containing slowly propagating DI vRNAs.  
355 These DIPs are, thus, promising candidates for antiviral therapy.

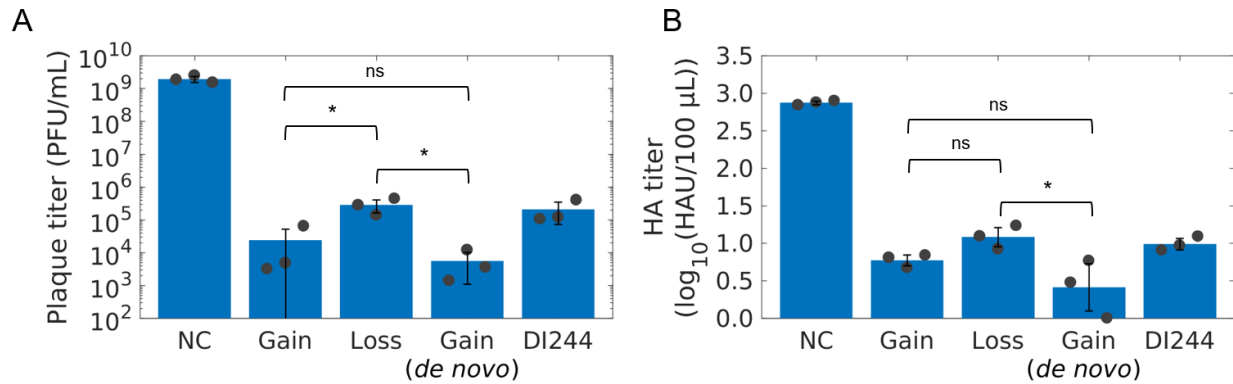

356  
357 **Figure 6: Interfering efficacy of DIPs derived from DI vRNAs showing highest gain, loss or gain (*de novo*) in**  
358 **their fraction during semi-continuous propagation of IAV.** Purely clonal DIPs containing a deletion in Seg 1  
359 (derived from DI vRNAs showing top gains and top loss) were generated using a modified reverse genetics  
360 methodology for reconstitution of purely clonal IAV DIPs (41). Next, DIPs were multiplied in genetically engineered  
361 MDCK-PB2(sus) cells (expressing PB2) in shake flask at a multiplicity of DIP (MODIP) E-2 (Supplementary Fig. 6).  
362 (A and B) Interference assay. MDCK(adh) cells were infected with STV only at an MOI of 0.01 (NC) or co-infected  
363 with the corresponding DIP resulting in a DIP/STV ratio of 3224 (number of DIPs:  $4.25 \times 10^8$  virions, number of  
364 STVs:  $1.32 \times 10^5$  virions, derived from the HA titer, Supplementary Table 7). For comparison, DI244, a prototypic,  
365 well-characterized DIP (23-25, 27), was used. (A) Infectious virus release, quantified by plaque assay. (B) Total virus  
366 particle release, measured by HA assay. Illustration includes results of three independent experiments (n = 3). Error  
367 bars indicates standard deviation. One-way ANOVA followed by Tukey's multiple comparison test (\* p < 0.05; ns  
368 p > 0.05, not significant) was used to determine significance.

### 369 370 **3 Discussion**

371 IAV DIPs have been proposed as an effective antiviral agent for the influenza disease. In this study,  
372 we investigated the *de novo* generation and the competition in the growth between a diversity of  
373 DIPs during long-term semi-continuous IAV infection in order to identify strong candidates for  
374 antiviral therapy. In general, DIPs and STVs are in a competition for cellular and viral resources  
375 in a co-infection scenario (19, 42). Due to replication advantage of DIPs, suppression of and  
376 interference with STV replication occurs (18-20). Moreover, it was shown that DIPs interfere with

377 STV propagation at the packaging step, as preferential incorporation of DI vRNAs over FL vRNAs  
378 was observed (21, 22). We, thus, hypothesized that DI vRNAs showing the strongest accumulation  
379 during long-term co-infection possess the highest interference efficacy with STV replication. In  
380 our experiments, a small subset of individual DI vRNAs was observed that showed a pronounced  
381 accumulation while the fractions of some other DI vRNAs strongly decreased (Fig. 5A). Next,  
382 DIPs harboring the most competitive DI vRNAs on Seg 1 were generated and we show that these  
383 DIPs exhibit a higher interfering efficacy than slowly propagating ones (Fig. 6). Strikingly, the  
384 interfering efficacy was also higher in comparison to DI244, a prototypic and well-characterized  
385 DIP (23-25), suggesting a huge potential of these candidates for antiviral treatment.

386 Our data show that the most competitive DI vRNAs are derived from the polymerase-encoding  
387 segments. Further, we found the highest variation, accumulation and *de novo* formation of DI  
388 vRNAs on these segments (Fig. 2A, Fig. 2B, Fig. 2C, respectively). This confirms previous  
389 studies, which showed that DI vRNAs are predominantly found on Seg 1, 2, and 3 (20, 33-36). In  
390 agreement with this, a bias toward the emergence of DI vRNAs on the polymerase-encoding  
391 segments was observed during production of IAV over 17 d in a fully-continuous two-stage  
392 bioreactor system (30). Mathematical modeling of the intracellular replication during STV and DIP  
393 co-infection also suggested that DI vRNAs located on the polymerase-encoding segments are more  
394 competitive than DI vRNAs on other segments (18). In particular, they even yielded high progeny  
395 numbers in less advantageous infections scenarios, i.e., when STV co-infection was delayed by  
396 several hours. Accordingly, in *in vivo* studies, DI244 containing a deletion on Seg 1, or DI vRNAs  
397 carrying deletion in Seg 1, 2 or 3 showed a pronounced antiviral effect upon administration against  
398 IAV replication in mice and in ferrets (14, 23-25)

399 Our results show that short DI vRNAs tended to accumulate to higher fractions than longer DI  
400 vRNAs (Fig. 3). In general, it is believed that the shorter length of DI vRNAs (in comparison to  
401 FL vRNAs) leads to a replication advantage (18-20), which supports our findings. However, our  
402 observation of a length sweet spot also indicates an optimal length for DI vRNA replication and  
403 spreading (Fig. 3). In agreement with this, the highly potent DI244 (395 nt) shows a similar DI  
404 vRNA length (Fig. 3) (23-25, 27). Other studies reported a similar mean DI vRNA length of 400–  
405 500 nt for Seg 1, 2, and 3 (12, 34). For DIPs originating from clinical isolates, a similar mean DI  
406 vRNA length of 377 nt (Seg 1), 390 nt (Seg 2), 490 nt (Seg 3) was found (36). Another  
407 investigation confirmed the finding of a replication advantage toward shorter vRNAs, but  
408 additionally suggested that the sequence (UTRs and coding region) may also have an influence on  
409 vRNA competition (42). This is consistent with a previous work proposing that not only the length,  
410 but also the sequence (or the deletion junction position) may drive the replication advantage of DI  
411 vRNAs (20). This may explain our observation of few larger DI vRNAs up to 1000 nt, which  
412 accumulated to high fractions (Fig. 3). In addition, two very long DI vRNAs (1905 nt and 1628 nt)  
413 were included in the top 15 gains (*de novo*) DI vRNAs (Supplementary Fig. 5). In further  
414 agreement, the *in vivo* interfering efficacy of three clonal DIPs containing DI vRNAs with a similar  
415 length (but diverse deletion junctions), differed significantly from each other (24). We found no  
416 clear patterns between the deletion junction positions of top gains (including *de novo*) and losses  
417 (Fig. 5B). These results may support the hypothesis that not only the DI vRNA length, but also the  
418 deletion junction site and further unknown regulatory effects are decisive factors for a competitive  
419 DI vRNAs.

420 Packaging of progeny virions of IAV is a complex process. The leading packaging model  
421 postulates a selective packaging of the eight different vRNA genome segments (43, 44). Decisive

422 for correct and efficient packaging is a special vRNA sequence (packaging signal), which was  
423 discovered using reverse genetics approaches (39). As DIPs comprise a truncated segment, this  
424 packaging signal might equally be affected. However, it was suggested that this packaging signal  
425 in the shortened segment typically remains intact (12, 43). The packaging signal is divided into  
426 two parts, the incorporation signal (NCR, including promoter region) and the bundling signal  
427 (located at the terminal ends of the coding region). Our results show that the incorporation signal  
428 is crucial for DIP propagation as it was unaffected by deletions (Fig. 4). However, several deletion  
429 junction sites were located in the bundling signal (Fig. 4, Fig. 5B, Supplementary Fig. 4).  
430 Therefore, we suggest that DIPs require only a part of the bundling signal for efficient replication  
431 and spreading. This finding does not agree with a previous study, which implied that the entire  
432 packaging signal of is crucial for DI vRNA stability (45) and for high interference (46).

433 Previous works showed that DI vRNAs interfere with FL vRNAs at the packaging process, by  
434 selectively suppressing the packaging either of the parent segment (21, 22) or the FL vRNA of  
435 another genome segment (47). However, one recent study showed the opposite, in which DI vRNA  
436 were packaged less frequently than FL vRNA (previously posted on a preprint server (48)).  
437 Furthermore, differences in the packaging rates were found between individual DI vRNAs (21, 46).  
438 Thus, the highly abundant DI vRNAs found in the present study may have an advantage in the  
439 entire propagation process over others, including both replication and packaging. Yet, further in-  
440 depth studies are required to better characterize the interference of DI vRNAs at the virus assembly  
441 step.

442 Taken together, we show that DIPs containing DI vRNAs with a superior propagation rate also  
443 show a superior capacity to interfere with STV replication. These DIPs are very interesting  
444 candidates for antiviral treatment. The highly competitive DI vRNAs are predominantly located on



445 the polymerase-encoding segments, display an optimal DI vRNA length, and conserve the  
446 incorporation signal, but do not require the entire bundling signal. In addition, yet unidentified  
447 sequence motifs certainly also play an additional role during DI vRNA propagation. Due to the  
448 complex features of highly competitive DIPs, the best candidates for antiviral therapy are probably  
449 challenging to design *in silico*. Thus, evolution studies are a more convenient screening tool as  
450 shown for DIPs of other virus families (49-51).

## 451 452 **4 Materials and Methods**

### 453 **4.1 Cells and viruses**

454 MDCK(adh) cells (ECACC, No. 84121903) were adapted in previous works to grow in suspension  
455 culture (52), and then in chemically defined Xeno<sup>TM</sup> medium (53), in this work referred to as  
456 MDCK(sus) cells. Further, this cell line was engineered to stably express the PB2 for the  
457 production of purely clonal DIPs harboring a DI vRNA in Seg 1 (25, 41) and is denoted as MDCK-  
458 PB2(sus). Cultivation of both cell lines was conducted in shake flasks at a working volume of  
459 50 mL (125 mL baffled Erlenmeyer Flask, Thermo Fisher Scientific, 4116-0125) using an orbital  
460 shaker (Multitron Pro, Infors HT; 50 mm shaking orbit) at 185 rpm and 37°C in a 5% CO<sub>2</sub>  
461 environment. The medium was supplemented with 8 mM glutamine. For MDCK-PB2(sus) cells,  
462 puromycin (Thermo Fisher Scientific, #A1113803) was added at a final concentration of  
463 0.5 µg/mL. Quantification of VCC, viability and diameter were performed using a cell counter (Vi-  
464 Cell<sup>TM</sup> XR, Beckman coulter, #731050). MDCK(adh) cells were maintained in Glasgow minimum  
465 essential medium (GMEM, Thermo Fisher Scientific, #221000093) supplemented with 10% fetal  
466 bovine serum and 1% peptone at 37°C and 5% CO<sub>2</sub>. The corresponding adherent MDCK cell line  
467 that stably express PB2 (MDCK-PB2(adh)) (41) was maintained in the presence of 1.5 µg/mL

468 puromycin. Adherent PB2-expressing HEK-293T (HEK-293T-PB2) cells (41) were maintained in  
469 Dulbecco's Modified Eagle Medium (DMEM, Gibco, #41966029) supplemented with 10% fetal  
470 bovine serum, 1% penicillin streptomycin (10,000 units/mL penicillin and 10,000 µg/mL  
471 streptomycin, Gibco, #15140122) and 1 µg/mL puromycin at 37°C and 5% CO<sub>2</sub>.

472 For virus infection during semi-continuous cultivation, PR8 (provided by Robert Koch Institute,  
473 Berlin, Germany) was used (53). The strain was adapted to MDCK(sus) cells and depletion of DI  
474 vRNAs was carried out over five passages at a very low MOI of 10<sup>-5</sup>. For the interference assay in  
475 MDCK(adh) cells, the same PR8 strain, but adapted to adherent MDCK cells was used. In addition,  
476 we generated candidate DIPs containing a deletion in Seg 1 using reverse genetics as described in  
477 chapter 4.6.

#### 478 **4.2 Small-scale two-stage cultivation system for semi-continuous STV/DIP propagation**

479 For the semi-continuous propagation of PR8, a two-stage cultivation system was used, which  
480 consisted of two baffled shake flasks (250 mL baffled Erlenmeyer Flask, Thermo Fisher Scientific,  
481 4116-0250) connected in series (Fig. 1B). The CSS and the VS were operated at a working volume  
482 of 90.00 mL and 77.52 mL, respectively. MDCK(sus) cells in exponential growth phase were  
483 seeded at a VCC of  $0.6 \times 10^6$  cells/mL and were cultivated in batch mode at 185 rpm, and 37°C in  
484 a 5% CO<sub>2</sub> environment for 2 days. When VCC reached approximately  $3.0 \times 10^6$  cells/mL,  
485 at -1.6 dpi, a calculated volume of cell suspension was harvested every 12 h, while pre-warmed  
486 fresh medium was added manually to obtain a RT (inverse of the dilution rate) of 38.3 h (both, CSS  
487 and VS). Please note that both shake flasks were not yet connected in series. After steady state was  
488 achieved, the cells in the VS were infected with PR8 at an MOI of 0.1 and trypsin (Thermo Fisher  
489 Scientific, #27250-018) was added (final activity of 20 U/mL). At 12 hpi, semi-continuous  
490 production was started by transferring cells from the CSS to the VS (V<sub>2</sub>). Furthermore, virus was



491 harvested ( $V_4$ ) and both shake flasks were filled up with pre-warmed fresh medium ( $V_1$  or  $V_3$ ) to  
492 obtain a RT of 38.3 h and 22.0 h for CSS and VS, respectively. Of importance is that the fresh  
493 medium, which was added to the VS, contained 60 U/mL trypsin to reach 20 U/mL in the VS. The  
494 respective transferred volumes are indicated (Equation 1–4). The RT of 22.0 h for the VS was  
495 chosen as previously published data showed a pronounced DIP/STV replication dynamic (31). In  
496 addition, samples were taken from the virus harvest at every volume transfer for analysis. Cell-free  
497 supernatants ( $300\times g$ ,  $4^\circ C$ , 5 min) were stored at  $-80^\circ C$  for further analysis.

$$498 \quad V_1 = (t_n - t_{n-1}) \cdot V_{CSS} \cdot D_{CSS} \quad (1)$$

$$499 \quad V_2 = V_1 = (t_n - t_{n-1}) \cdot V_{CSS} \cdot D_{CSS} \quad (2)$$

$$500 \quad V_3 = (t_n - t_{n-1}) \cdot (V_{VS} \cdot D_{VS} - V_{CSS} \cdot D_{CSS}) \quad (3)$$

$$501 \quad V_4 = (t_n - t_{n-1}) \cdot D_{VS} \cdot V_{VS} \quad (4)$$

502 Where  $t_n$  denotes the sample time point, and  $t_{n-1}$  the previous sample time point.  $V_{CSS}$  is the volume  
503 of the CSS,  $V_{VS}$  is the volume of VS,  $D_{CSS}$  is the dilution rate of CSS,  $D_{VS}$  is the dilution rate of  
504 VS.  $V_{CSS}$ ,  $D_{CSS}$ ,  $D_{VS}$  were predefined as mentioned above.  $V_3$  was set as  $0.5 \times V_2$  to ensure a  
505 sufficient volume of fresh medium in the VS. This assumption was applied to calculate the volume  
506 of  $V_{VS}$ .

### 507 **4.3 Virus quantification**

508 Quantification of the infectious virus titer was performed by TCID<sub>50</sub> assay as described previously  
509 (54) with a measurement error of  $\pm 0.3 \log_{10}$  (55). The active DIP titer (required for calculation of  
510 an MODIP for production of candidate DIPs in shake flasks, chapter 4.6.2) was quantified by  
511 plaque assay using MDCK-PB2(adh) cells (measurement error of  $\leq 43.8\%$ ) (25). To determine the

512 infectious virus titers in the interference assay (chapter 4.7), MDCK(adh) cells were deployed in  
513 the same plaque assay (25). In addition, an HA assay was used to quantify the total number of  
514 virions in the supernatant with a measurement error of  $\pm 0.15 \log_{10}(\text{HAU}/100 \mu\text{L})$  (56).  
515 Concentration of DIPs ( $c_{\text{DIP}}$ ) or concentration of STVs ( $c_{\text{STV}}$ ) were derived from the HA titer and  
516 determined according to Equation 5, where  $c_{\text{RBC}}$  denotes the concentration of red blood cells  
517 ( $2.0 \times 10^7$  cells/mL).

$$518 \quad c_{\text{DIP}} = 10^{\frac{\log \text{HA}}{100 \mu\text{L}}} \cdot c_{\text{RBC}} \quad (5)$$

#### 519 **4.4 PCR measurements**

520 Genomic vRNA in progeny virions were examined using PCR. In brief, isolation of vRNA from  
521 150  $\mu\text{L}$  cell-free supernatants was carried out with the NucleoSpin RNA virus kit (Macherey-  
522 Nagel, 740956) as described in the manufacturers' instructions. In order to analyze the presence of  
523 FL vRNA and DI vRNA (truncated form), a segment-specific RT-PCR was performed (see 4.4.1).  
524 Real-time RT-qPCR was applied for absolute quantification of Seg 5 vRNA from the progeny  
525 virions (see 4.4.2).

##### 526 **4.4.1 Segment-specific RT-PCR**

527 A recently described method was utilized for segment-specific RT-PCR (17, 30). In brief, isolated  
528 vRNA was reverse transcribed into cDNA using universal primers that bind at the conserved  
529 terminal regions of all eight IAV genome segments (Supplementary Table 1). Subsequently,  
530 segment-specific primers were used for amplification of the respective genome segment sequence  
531 by PCR (Supplementary Table 1). Finally, PCR products were analyzed by agarose gel  
532 electrophoresis.

#### 533 **4.4.2 Real-time RT-qPCR**

534 A recently reported method for the specific detection and quantification of influenza viral RNA  
535 segments using real-time RT-qPCR was employed (17, 57, 58). Briefly, RNA reference standards  
536 were *in vitro* synthesized for absolute quantification (primers required for generation are listed in  
537 Supplementary Table 4). Isolated vRNA of the samples was used for reverse transcription, along  
538 with a dilution series of the reference standards (primers listed in Supplementary Table 2), followed  
539 by real-time qPCR (primer sequence in Supplementary Table 3). Calculation for absolute  
540 quantification of vRNA of Seg 5 was conducted as previously described (17, 58).

#### 541 **4.4.3 NGS and data processing**

542 Sample preparation, NGS library preparation and sequencing analysis of deletion junctions was  
543 performed according to a recently published study (32).

#### 544 **4.5 Analysis of deletion junctions**

545 Deletion junctions refer to the DI vRNAs in the viral population, while deletion junction sites refer  
546 to the start and end position of the breaking points in the viral genome. Deletion junctions that did  
547 not accumulate to levels above 14 NGS reads in at least one sampling time point were removed  
548 from the data set for higher accuracy (32). Furthermore, defective vRNAs that showed more than  
549 85 % of the length of FL vRNA were excluded from analysis in this work (except for  
550 Supplementary Fig. 3). DI vRNA 3' and 5' length indicated the number of retained nucleotides  
551 prior and after the deletion junction at the respective vRNA end. Of note is that DI vRNA sequence  
552 was reported in negative-sense and 3' to 5' orientation. The calculation of the DI vRNA length  
553 comprised the following sequence lengths: Seg 1 (2341 nucleotides (nt)), Seg 2 (2341 nt), Seg 3  
554 (2233 nt), Seg 4 (1775 nt), Seg 5 (1565 nt), Seg 6 (1413 nt), Seg 7 (1027 nt), Seg 8 (890 nt).

555 Number of nucleotides of the incorporation signal (NCR) and the bundling signal (terminal ends  
556 of coding region), which together form the packaging signal, were taken from a recent review (59).

#### 557 **4.6 Generation of purely clonal DIPs containing a deletion in Seg 1**

558 To generate purely clonal Seg 1 derived DIPs (top gain, loss, gain (*de novo*)) in the absence of  
559 STV, we used a previously established plasmid-based reverse-genetics system (41). More  
560 specifically, to complement the missing PB2 to allow DIP production without STV, we used a co-  
561 culture of HEK-293T-PB2 cells and MDCK-PB2(adh) cells for reconstitution.

##### 562 **4.6.1 Generation of plasmids**

563 Plasmids harboring specific deletions were generated as described previously (41). In brief,  
564 pHW191 encoding the PR8-derived PB2 gene (60) was used as a template for PCR amplification  
565 (Phusion Hot Start II DNA polymerase, Thermo Fisher, #F549L). Here, the desired 5'-fragment  
566 (containing overhangs complementary to the 3'-fragment) of a specified deletion junction  
567 (Supplementary Table 5), using a 5'-specific forward and reverse primers set (Supplementary  
568 Table 6) was used. Similarly, a set of 3'-specific primers were used to amplify the desired 3'-  
569 fragment (containing overhangs complementary to the 5'-fragment) of a specified deletion junction  
570 from the pHW191 template DNA. Next, the 5'-fragments hybridized with the overlapping 3'-  
571 fragments, resulting in PCR products with the individual deletion junctions (splice-overlapped  
572 products) after subsequent amplification cycles at an annealing temperature of 62°C. Lastly, the  
573 internally spliced PB2 sequence was inserted in pHW2000-GGAarI using golden-gate cloning (61,  
574 62). All plasmids were sequenced to confirm the generated deletion junctions.

#### 575 **4.6.2 Rescue and production of DIPs**

576 For rescue of purely clonal DIPs containing a deletion in Seg 1 (41), we co-transfected a co-culture  
577 of adherent HEK-293T-PB2 cells ( $0.2 \times 10^6$  cells/well) and MDCK-PB2(adh) cells  
578 ( $0.2 \times 10^6$  cells/well) with corresponding plasmids harboring a deletion in the PB2 sequence  
579 (50 ng) and 1  $\mu$ g of each pHW192-pHW198 plasmid (encoding for the remaining gene segments  
580 of PR8 IAV) using the calcium phosphate method in a 6-well format. DIP-containing supernatants  
581 were harvested at 4, 6, 8, 10, and 12 days post transfection and stored at  $-80^\circ\text{C}$  for further use.  
582 Larger stocks (seed viruses) of purely clonal Seg 1 DIPs were generated in MDCK-PB2(sus) cells  
583 in shake flasks.

584 The production of Seg 1 DIPs in MDCK-PB2(sus) cells was conducted according to a recently  
585 published paper (25). In brief, MDCK-PB2(sus) cells, cultivated in shake flasks were centrifuged  
586 ( $300\times g$ , 5 min, room temperature) and used to inoculate a new shake flask at  $2.0 \times 10^6$  cells/mL  
587 with fresh media and trypsin (final activity of 20 U/mL). Subsequently, cells were infected at an  
588 MODIP of E-2. Cell-free supernatants ( $3000\times g$ ,  $4^\circ\text{C}$ , 10 min) were stored at  $-80^\circ\text{C}$  for further  
589 analysis.

#### 590 **4.7 Interference assay**

591 To measure the efficacy of DIPs to suppress STV replication, we performed an *in vitro* co-infection  
592 assay in MDCK(adh) cells following a previously published description (26). To summarize,  
593 MDCK(adh) cells, cultivated in 6-well plates, were washed twice with phosphate-buffered saline  
594 (PBS). Next, cells were either infected with STV only (MOI 0.01, based on the  $\text{TCID}_{50}$  titer) or co-  
595 infected with STV and 125  $\mu\text{L}$  of the produced DIP material (diluted for normalization,  
596 Supplementary Table 7). Wells were filled up to 250  $\mu\text{L}$  with infection medium (GMEM, 1%

597 peptone, 5 U/mL trypsin) and incubation was conducted for 1 h at 37°C and 5% CO<sub>2</sub>.  
598 Subsequently, the inoculum was aspirated, the cells washed with PBS and 2 mL of infection  
599 medium was added. Cells were incubated for 24 h at 37°C and 5% CO<sub>2</sub>. The supernatant was  
600 harvested and stored at -80°C until further analysis by plaque assay and HA assay.

#### 601 **4.8 Data availability**

602 The reference sequence of the PR8 genome used for alignment can be found under the following  
603 NCBI accession numbers: PB2 = AF389115.1, PB1 = AF389116.1, PA = AF389117.1,  
604 HA = AF389118.1, NP = AF389119.1, NA = AF389120.1, M = AF389121.1, NS = AF389122.1.  
605 The complete NGS dataset is available under the BioProject accession number PRJNA743179.

606

#### 607 **5 Conflict of Interest**

608 A patent for the use of OP7 (a DIP containing point mutations instead of a deletion in Seg 7) as an  
609 antiviral agent for treatment of IAV infection is pending. Patent holders are S.Y.K. and U.R.  
610 Another patent for the use of DI244 and OP7 as an antiviral agent for treatment of coronavirus  
611 infection is pending. Patent holders are S.Y.K., U.R.

612

#### 613 **6 Author Contributions**

614 Conceptualization, L.P., D.R., T.D., Y.G., C.B.B., S.Y.K. and U.R.; Formal analysis, L.P., D.R.,  
615 F.G.A and S.Y.K.; Funding acquisition, C.B.B. and U.R; Investigation, L.P., D.R., T.D. and  
616 F.G.A.; Project administration, L.P. and S.Y.K.; Supervision, Y.G., C.B.B., S.Y.K. and U.R.;  
617 Visualization, L.P., D.R. and S.Y.K.; Writing – original draft, L.P., T.D. and S.Y.K.; Writing –  
618 review & editing, L.P., D.R., T.D., F.G.A., Y.G., C.B.B., S.Y.K. and U.R..

## 619 7 Acknowledgments

620 Special thanks to Claudia Best and Nancy Wynserski for their outstanding technical support. We  
621 thank Thomas Bissinger for providing the seed virus and Marc Hein for valuable discussions. The  
622 authors appreciate the sequencing work of Alvaro Hernandez, Christy Wright and the staff at the  
623 Roy. J. Carver Biotechnology Center, University of Illinois. We would like to thank St. Jude  
624 children research hospital, Memphis, United States for providing pHW2000 plasmids.  
625 Furthermore, a special thank is directed to Prof. Stefan Pöhlmann, Prerna Arora, and Najat Bdeir  
626 of the German Primate Center, Göttingen, Germany for providing plasmids and cell lines for rescue  
627 of DIP candidates and helpful discussions. We thank Shanghai BioEngine Sci-Tech and Prof. Tan  
628 from the East China University of Science and Technology for supplying the Xeno<sup>TM</sup> medium. The  
629 work was supported by the Defense Advanced Research Projects Agency  
630 (<https://www.darpa.mil/program/intercept>), INTERCEPT program under Cooperative Agreement  
631 W911NF-17-2-0012 and DARPA-16-35-INTERCEPT-FP-018.

## 632 8 References

- 633 1. Paget J, Spreeuwenberg P, Charu V, Taylor RJ, Iuliano AD, Bresee J, Simonsen L, Viboud  
634 C, Global Seasonal Influenza-associated Mortality Collaborator N, Teams\* GLC. 2019.  
635 Global mortality associated with seasonal influenza epidemics: New burden estimates and  
636 predictors from the GLaMOR Project. *J Glob Health* 9:020421.
- 637 2. Taubenberger JK, Morens DM. 2020. The 1918 Influenza Pandemic and Its Legacy. *Cold  
638 Spring Harb Perspect Med* 10.
- 639 3. Moa AM, Chughtai AA, Muscatello DJ, Turner RM, MacIntyre CR. 2016. Immunogenicity  
640 and safety of inactivated quadrivalent influenza vaccine in adults: A systematic review and  
641 meta-analysis of randomised controlled trials. *Vaccine* 34:4092-4102.
- 642 4. Samson SI, Leventhal PS, Salamand C, Meng Y, Seet BT, Landolfi V, Greenberg D,  
643 Hollingsworth R. 2019. Immunogenicity of high-dose trivalent inactivated influenza  
644 vaccine: a systematic review and meta-analysis. *Expert Rev Vaccines* 18:295-308.
- 645 5. Vogel OA, Manicassamy B. 2020. Broadly Protective Strategies Against Influenza Viruses:  
646 Universal Vaccines and Therapeutics. *Front Microbiol* 11:135.

- 647 6. Tricco AC, Chit A, Soobiah C, Hallett D, Meier G, Chen MH, Tashkandi M, Bauch CT,  
648 Loeb M. 2013. Comparing influenza vaccine efficacy against mismatched and matched  
649 strains: a systematic review and meta-analysis. *BMC Med* 11:153.
- 650 7. Paules C, Subbarao K. 2017. Influenza. *The Lancet* 390:697-708.
- 651 8. O'Hanlon R, Shaw ML. 2019. Baloxavir marboxil: the new influenza drug on the market.  
652 *Curr Opin Virol* 35:14-18.
- 653 9. Hurt AC, Ernest J, Deng YM, Iannello P, Besselaar TG, Birch C, Buchy P, Chittaganpitch  
654 M, Chiu SC, Dwyer D, Guigon A, Harrower B, Kei IP, Kok T, Lin C, McPhie K, Mohd A,  
655 Olveda R, Panayotou T, Rawlinson W, Scott L, Smith D, D'Souza H, Komadina N, Shaw  
656 R, Kelso A, Barr IG. 2009. Emergence and spread of oseltamivir-resistant A(H1N1)  
657 influenza viruses in Oceania, South East Asia and South Africa. *Antiviral Res* 83:90-3.
- 658 10. Hayden FG, Sugaya N, Hirotsu N, Lee N, de Jong MD, Hurt AC, Ishida T, Sekino H,  
659 Yamada K, Portsmouth S, Kawaguchi K, Shishido T, Arai M, Tsuchiya K, Uehara T,  
660 Watanabe A, Baloxavir Marboxil Investigators G. 2018. Baloxavir Marboxil for  
661 Uncomplicated Influenza in Adults and Adolescents. *N Engl J Med* 379:913-923.
- 662 11. Jones JC, Kumar G, Barman S, Najera I, White SW, Webby RJ, Govorkova EA. 2018.  
663 Identification of the I38T PA Substitution as a Resistance Marker for Next-Generation  
664 Influenza Virus Endonuclease Inhibitors. *mBio* 9.
- 665 12. Dimmock NJ, Easton AJ. 2014. Defective interfering influenza virus RNAs: time to  
666 reevaluate their clinical potential as broad-spectrum antivirals? *J Virol* 88:5217-27.
- 667 13. Huo C, Cheng J, Xiao J, Chen M, Zou S, Tian H, Wang M, Sun L, Hao Z, Hu Y. 2020.  
668 Defective Viral Particles Produced in Mast Cells Can Effectively Fight Against Lethal  
669 Influenza A Virus. *Front Microbiol* 11:553274.
- 670 14. Zhao H, To KKW, Chu H, Ding Q, Zhao X, Li C, Shuai H, Yuan S, Zhou J, Kok KH, Jiang  
671 S, Yuen KY. 2018. Dual-functional peptide with defective interfering genes effectively  
672 protects mice against avian and seasonal influenza. *Nat Commun* 9:2358.
- 673 15. Yang Y, Lyu T, Zhou R, He X, Ye K, Xie Q, Zhu L, Chen T, Shen C, Wu Q, Zhang B,  
674 Zhao W. 2019. The Antiviral and Antitumor Effects of Defective Interfering  
675 Particles/Genomes and Their Mechanisms. *Front Microbiol* 10:1852.
- 676 16. Vignuzzi M, Lopez CB. 2019. Defective viral genomes are key drivers of the virus-host  
677 interaction. *Nat Microbiol* 4:1075-1087.
- 678 17. Kupke SY, Riedel D, Frensing T, Zmora P, Reichl U. 2019. A Novel Type of Influenza A  
679 Virus-Derived Defective Interfering Particle with Nucleotide Substitutions in Its Genome.  
680 *J Virol* 93:e01786-18.
- 681 18. Laske T, Heldt FS, Hoffmann H, Frensing T, Reichl U. 2016. Modeling the intracellular  
682 replication of influenza A virus in the presence of defective interfering RNAs. *Virus Res*  
683 213:90-99.
- 684 19. Marriott AC, Dimmock NJ. 2010. Defective interfering viruses and their potential as  
685 antiviral agents. *Rev Med Virol* 20:51-62.
- 686 20. Nayak DP, Chambers TM, Akkina RK. 1985. Defective-Interfering (DI) RNAs of Influenza  
687 Viruses: Origin, Structure, Expression, and Interference, p 103-151. *In* Cooper M, Eisen H,  
688 Goebel W, Hofschneider PH, Koprowski H, Melchers F, Oldstone M, Rott R, Schweiger



- 689 HG, Vogt PK, Wilson I (ed), Current Topics in Microbiology and Immunology  
690 doi:10.1007/978-3-642-70227-3\_3. Springer Berlin Heidelberg, Berlin, Heidelberg.
- 691 21. Duhaut SD, McCauley JW. 1996. Defective RNAs inhibit the assembly of influenza virus  
692 genome segments in a segment-specific manner. *Virology* 216:326-37.
- 693 22. Odagiri T, Tashiro M. 1997. Segment-specific noncoding sequences of the influenza virus  
694 genome RNA are involved in the specific competition between defective interfering RNA  
695 and its progenitor RNA segment at the virion assembly step. *J Virol* 71:2138-45.
- 696 23. Dimmock NJ, Dove BK, Meng B, Scott PD, Taylor I, Cheung L, Hallis B, Marriott AC,  
697 Carroll MW, Easton AJ. 2012. Comparison of the protection of ferrets against pandemic  
698 2009 influenza A virus (H1N1) by 244 DI influenza virus and oseltamivir. *Antiviral Res*  
699 96:376-85.
- 700 24. Dimmock NJ, Rainsford EW, Scott PD, Marriott AC. 2008. Influenza virus protecting  
701 RNA: an effective prophylactic and therapeutic antiviral. *J Virol* 82:8570-8.
- 702 25. Hein MD, Arora P, Marichal-Gallardo P, Winkler M, Genzel Y, Pohlmann S, Schughart K,  
703 Kupke SY, Reichl U. 2021. Cell culture-based production and in vivo characterization of  
704 purely clonal defective interfering influenza virus particles. *BMC Biol* 19:91.
- 705 26. Hein MD, Kollmus H, Marichal-Gallardo P, Puttker S, Benndorf D, Genzel Y, Schughart  
706 K, Kupke SY, Reichl U. 2021. OP7, a novel influenza A virus defective interfering particle:  
707 production, purification, and animal experiments demonstrating antiviral potential. *Appl*  
708 *Microbiol Biotechnol* 105:129-146.
- 709 27. Easton AJ, Scott PD, Edworthy NL, Meng B, Marriott AC, Dimmock NJ. 2011. A novel  
710 broad-spectrum treatment for respiratory virus infections: influenza-based defective  
711 interfering virus provides protection against pneumovirus infection in vivo. *Vaccine*  
712 29:2777-84.
- 713 28. Scott PD, Meng B, Marriott AC, Easton AJ, Dimmock NJ. 2011. Defective interfering  
714 influenza A virus protects in vivo against disease caused by a heterologous influenza B  
715 virus. *J Gen Virol* 92:2122-2132.
- 716 29. Rand U, Kupke SY, Shkarlet H, Hein MD, Hirsch T, Marichal-Gallardo P, Cicin-Sain L,  
717 Reichl U, Bruder D. 2021. Antiviral Activity of Influenza A Virus Defective Interfering  
718 Particles against SARS-CoV-2 Replication In Vitro through Stimulation of Innate  
719 Immunity. *Cells* 10.
- 720 30. Frensing T, Heldt FS, Pflugmacher A, Behrendt I, Jordan I, Flockerzi D, Genzel Y, Reichl  
721 U. 2013. Continuous influenza virus production in cell culture shows a periodic  
722 accumulation of defective interfering particles. *PLoS One* 8:e72288.
- 723 31. Tapia F, Laske T, Wasik MA, Rammhold M, Genzel Y, Reichl U. 2019. Production of  
724 Defective Interfering Particles of Influenza A Virus in Parallel Continuous Cultures at Two  
725 Residence Times-Insights From qPCR Measurements and Viral Dynamics Modeling. *Front*  
726 *Bioeng Biotechnol* 7:275.
- 727 32. Alnaji FG, Holmes JR, Rendon G, Vera JC, Fields CJ, Martin BE, Brooke CB. 2019.  
728 Sequencing Framework for the Sensitive Detection and Precise Mapping of Defective  
729 Interfering Particle-Associated Deletions across Influenza A and B Viruses. *J Virol* 93.

- 730 33. Davis AR, Nayak DP. 1979. Sequence relationships among defective interfering influenza  
731 viral RNAs. *Proc Natl Acad Sci U S A* 76:3092-6.
- 732 34. Duhaut SD, Dimmock NJ. 1998. Heterologous protection of mice from a lethal human  
733 H1N1 influenza A virus infection by H3N8 equine defective interfering virus: comparison  
734 of defective RNA sequences isolated from the DI inoculum and mouse lung. *Virology*  
735 248:241-53.
- 736 35. Jennings PA, Finch JT, Winter G, Robertson JS. 1983. Does the higher order structure of  
737 the influenza virus ribonucleoprotein guide sequence rearrangements in influenza viral  
738 RNA? *Cell* 34:619-627.
- 739 36. Saira K, Lin X, DePasse JV, Halpin R, Twaddle A, Stockwell T, Angus B, Cozzi-Lepri A,  
740 Delfino M, Dugan V, Dwyer DE, Freiberg M, Horban A, Losso M, Lynfield R, Wentworth  
741 DN, Holmes EC, Davey R, Wentworth DE, Ghedin E, Group IFS, Group IFS. 2013.  
742 Sequence analysis of in vivo defective interfering-like RNA of influenza A H1N1 pandemic  
743 virus. *J Virol* 87:8064-74.
- 744 37. Tapia F, Jordan I, Genzel Y, Reichl U. 2017. Efficient and stable production of Modified  
745 Vaccinia Ankara virus in two-stage semi-continuous and in continuous stirred tank  
746 cultivation systems. *PLoS One* 12:e0182553.
- 747 38. Routh A, Johnson JE. 2014. Discovery of functional genomic motifs in viruses with  
748 ViReMa-a Virus Recombination Mapper-for analysis of next-generation sequencing data.  
749 *Nucleic Acids Res* 42:e11.
- 750 39. Fujii Y, Goto H, Watanabe T, Yoshida T, Kawaoka Y. 2003. Selective incorporation of  
751 influenza virus RNA segments into virions. *Proc Natl Acad Sci U S A* 100:2002-7.
- 752 40. Goto H, Muramoto Y, Noda T, Kawaoka Y. 2013. The genome-packaging signal of the  
753 influenza A virus genome comprises a genome incorporation signal and a genome-bundling  
754 signal. *J Virol* 87:11316-22.
- 755 41. Bdeir N, Arora P, Gartner S, Hoffmann M, Reichl U, Pohlmann S, Winkler M. 2019. A  
756 system for production of defective interfering particles in the absence of infectious  
757 influenza A virus. *PLoS One* 14:e0212757.
- 758 42. Widjaja I, de Vries E, Rottier PJ, de Haan CA. 2012. Competition between influenza A  
759 virus genome segments. *PLoS One* 7:e47529.
- 760 43. Hutchinson EC, von Kirchbach JC, Gog JR, Digard P. 2010. Genome packaging in  
761 influenza A virus. *J Gen Virol* 91:313-28.
- 762 44. Noda T, Kawaoka Y. 2010. Structure of influenza virus ribonucleoprotein complexes and  
763 their packaging into virions. *Rev Med Virol* 20:380-91.
- 764 45. Duhaut S, Dimmock NJ. 2000. Approximately 150 nucleotides from the 5' end of an  
765 influenza A segment 1 defective virion RNA are needed for genome stability during  
766 passage of defective virus in infected cells. *Virology* 275:278-85.
- 767 46. Duhaut SD, Dimmock NJ. 2002. Defective segment 1 RNAs that interfere with production  
768 of infectious influenza A virus require at least 150 nucleotides of 5' sequence: evidence  
769 from a plasmid-driven system. *J Gen Virol* 83:403-411.
- 770 47. Ueda M, Nakajima K, Sugiura A. 1980. Extra RNAs of von Magnus particles of influenza  
771 virus cause reduction of particular polymerase genes. *J Virol* 34:1-8.

- 772 48. Alnaji FG, Reiser WK, Velthuis At, Brooke CB. 2021. Influenza A virus defective viral  
773 genomes are inefficiently packaged into virions relative to wild-type genomic RNAs.  
774 bioRxiv doi:10.1101/2021.05.13.444068:2021.05.13.444068.
- 775 49. Levi LI, Rezelj VV, Henrion-Lacritick A, Erazo D, Boussier J, Vallet T, Bernhauerova V,  
776 Suzuki Y, Carrau L, Weger-Lucarelli J, Saleh MC, Vignuzzi M. 2021. Defective viral  
777 genomes from chikungunya virus are broad-spectrum antivirals and prevent virus  
778 dissemination in mosquitoes. *PLoS Pathog* 17:e1009110.
- 779 50. Rezelj VV, Carrau L, Merwaiss F, Levi LI, Erazo D, Tran QD, Henrion-Lacritick A,  
780 Gausson V, Suzuki Y, Shengjuler D, Meyer B, Vallet T, Weger-Lucarelli J, Bernhauerova  
781 V, Titievsky A, Sharov V, Pietropaoli S, Diaz-Salinas MA, Legros V, Pardigon N, Barba-  
782 Spaeth G, Brodsky L, Saleh MC, Vignuzzi M. 2021. Defective viral genomes as therapeutic  
783 interfering particles against flavivirus infection in mammalian and mosquito hosts. *Nat*  
784 *Commun* 12:2290.
- 785 51. Welch SR, Tilston NL, Lo MK, Whitmer SLM, Harmon JR, Scholte FEM, Spengler JR,  
786 Duprex WP, Nichol ST, Spiropoulou CF. 2020. Inhibition of Nipah Virus by Defective  
787 Interfering Particles. *J Infect Dis* 221:S460-S470.
- 788 52. Lohr V, Genzel Y, Behrendt I, Scharfenberg K, Reichl U. 2010. A new MDCK suspension  
789 line cultivated in a fully defined medium in stirred-tank and wave bioreactor. *Vaccine*  
790 28:6256-64.
- 791 53. Bissinger T, Fritsch J, Mihut A, Wu Y, Liu X, Genzel Y, Tan WS, Reichl U. 2019. Semi-  
792 perfusion cultures of suspension MDCK cells enable high cell concentrations and efficient  
793 influenza A virus production. *Vaccine* 37:7003-7010.
- 794 54. Genzel Y, Reichl U. 2007. Vaccine Production, p 457-473. *In* Pörtner R (ed), *Animal Cell*  
795 *Biotechnology* doi:10.1007/978-1-59745-399-8\_21. Humana Press, Totowa, NJ.
- 796 55. Genzel Y, Rödiger J, Rapp E, Reichl U. 2014. Vaccine Production: Upstream Processing with  
797 Adherent or Suspension Cell Lines, p 371-393. *In* Pörtner R (ed), *Animal Cell*  
798 *Biotechnology: Methods and Protocols* doi:10.1007/978-1-62703-733-4\_23. Humana  
799 Press, Totowa, NJ.
- 800 56. Kalbfuss B, Knochlein A, Krober T, Reichl U. 2008. Monitoring influenza virus content in  
801 vaccine production: precise assays for the quantitation of hemagglutination and  
802 neuraminidase activity. *Biologicals* 36:145-61.
- 803 57. Kawakami E, Watanabe T, Fujii K, Goto H, Watanabe S, Noda T, Kawaoka Y. 2011.  
804 Strand-specific real-time RT-PCR for distinguishing influenza vRNA, cRNA, and mRNA.  
805 *J Virol Methods* 173:1-6.
- 806 58. Frensing T, Kupke SY, Bachmann M, Fritzsche S, Gallo-Ramirez LE, Reichl U. 2016.  
807 Influenza virus intracellular replication dynamics, release kinetics, and particle morphology  
808 during propagation in MDCK cells. *Appl Microbiol Biotechnol* 100:7181-92.
- 809 59. Breen M, Nogales A, Baker SF, Martinez-Sobrido L. 2016. Replication-Competent  
810 Influenza A Viruses Expressing Reporter Genes. *Viruses* 8.
- 811 60. Hoffmann E, Neumann G, Kawaoka Y, Hobom G, Webster RG. 2000. A DNA transfection  
812 system for generation of influenza A virus from eight plasmids. *Proc Natl Acad Sci U S A*  
813 97:6108-13.

- 814 61. Andreou AI, Nakayama N. 2018. Mobius Assembly: A versatile Golden-Gate framework  
815 towards universal DNA assembly. PLoS One 13:e0189892.
- 816 62. Engler C, Gruetzner R, Kandzia R, Marillonnet S. 2009. Golden gate shuffling: a one-pot  
817 DNA shuffling method based on type IIs restriction enzymes. PLoS One 4:e5553.
- 818
